# Supplementary material for: Antimicrobial Resistance Profile of Bacterial Isolates from Urinary Tract Infections in Companion Animals in Central Italy
Source: MDPI journal article supplement (doi:10.3390/antibiotics11101363), 2022-10-06
Supplement: s1 [file s1]

**Table S1.** Table summarizes the resistant bacteria isolated from urine samples in dogs

| <b>Antibiotics</b>          | <b><i>Acinetobacter</i><br/>spp. n=1</b> | <b><i>E. coli</i><br/>n=263</b> | <b><i>Enterobacter</i><br/>spp. n=13</b> | <b><i>Enterococcus</i><br/>spp. n=30</b> | <b><i>Klebsiella</i><br/>spp. n=21</b> | <b><i>Pantoea</i><br/><i>dispersa</i><br/>n=1</b> | <b><i>Pausterella</i><br/><i>pneumotropica</i><br/>n=2</b> | <b><i>Proteus</i><br/><i>mirabilis</i><br/>n=86</b> | <b><i>Pseudomonas</i><br/>spp. n=18</b> | <b><i>Raoultella</i><br/><i>ornithinolytica</i><br/>n=1</b> | <b><i>Staphylococcus</i><br/>spp. n=14</b> |
|-----------------------------|------------------------------------------|---------------------------------|------------------------------------------|------------------------------------------|----------------------------------------|---------------------------------------------------|------------------------------------------------------------|-----------------------------------------------------|-----------------------------------------|-------------------------------------------------------------|--------------------------------------------|
| Ampicillin                  | 1(100%)                                  | 125(47.5%)                      | -                                        | -                                        | 21(100%)                               | -                                                 | 0                                                          | 86 (100%)                                           | 17 (94.4%)                              | 1 (100%)                                                    | -                                          |
| Amoxicillin/Clavulanic acid | -                                        | 46(17.4%)                       | 13(100%)                                 | 12(40%)                                  | 2(9.5%)                                | 0                                                 | -                                                          | 2 (2.32%)                                           | -                                       | 1 (100%)                                                    | 3(21.4%)                                   |
| Amikacin                    | -                                        | 0                               | 0                                        | -                                        | 0                                      | 0                                                 | -                                                          | 7 (8.13%)                                           | 0                                       | 0                                                           | 0                                          |
| Chloramphenicol             | -                                        | 29(11%)                         | 4(30.7%)                                 | 3(10%)                                   | 4(19%)                                 | 0                                                 | -                                                          | 41<br>(47.6%)                                       | -                                       | 1 (100%)                                                    | 3(21.4%)                                   |
| Cephalothin                 | -                                        | 101(38.4%)                      | 13(100%)                                 | -                                        | 7(33.3%)                               | 0                                                 | -                                                          | 41<br>(47.6%)                                       | -                                       | 1 (100%)                                                    | 2(14.2%)                                   |
| Ceftiofur                   | 1(100%)                                  | 53(20.1%)                       | 8(61.5%)                                 | -                                        | 7(33.3%)                               | 0                                                 | 0                                                          | 27<br>(31.3%)                                       | 16 (88.8%)                              | 1 (100%)                                                    | 3(21.4%)                                   |
| Cephalexin                  | 1(100%)                                  | 82(31.1%)                       | 13(100%)                                 | -                                        | 7(33.3%)                               | 0                                                 | 0                                                          | 41<br>(47.6%)                                       | 17 (94.4%)                              | 1 (100%)                                                    | 0                                          |
| Cefpodoxime                 | 1(100%)                                  | 81(30.7%)                       | 10(76.9%)                                | -                                        | 7(33.3%)                               | 0                                                 | 0                                                          | 40<br>(46.5%)                                       | 17 (94.4%)                              | 1 (100%)                                                    | 2(14.2%)                                   |
| Doxycycline                 | 0                                        | 47(17.8%)                       | 4(30.7%)                                 | 17(56.6%)                                | 4(19%)                                 | 0                                                 | -                                                          | 74 (86%)                                            | 1 (5.5%)                                | 1 (100%)                                                    | 2(14.2%)                                   |
| Enrofloxacin                | -                                        | 33(12.5%)                       | 7(53.8%)                                 | 14(46.6%)                                | 7(33.3%)                               | 0                                                 | -                                                          | 19 (22%)                                            | 5 (27.7%)                               | 1 (100%)                                                    | 5(35.7%)                                   |
| Nitrofurantoin              | 1(100%)                                  | 53(20.1%)                       | 4(30.7%)                                 | 4(13.3%)                                 | 11(52.3%)                              | 0                                                 | 0                                                          | 86 (100%)                                           | 17 (94.4%)                              | 0                                                           | 4(28.5%)                                   |
| Gentamicin                  | 0                                        | 3(1.14%)                        | 4(30.7%)                                 | -                                        | 0                                      | 0                                                 | -                                                          | 13<br>(15.1%)                                       | 1 (5.5%)                                | 1 (100%)                                                    | 1(7.1%)                                    |
| Imipenem                    | 0                                        | 2(0.7%)                         | 1(7.6%)                                  | -                                        | 0                                      | 0                                                 | 0                                                          | 51<br>(59.3%)                                       | 1 (5.5%)                                | 0                                                           | -                                          |
| Marbofloxacin               | 0                                        | 6(2.28%)                        | 8(61.5%)                                 | 15(50%)                                  | 7(33.3%)                               | 0                                                 | 0                                                          | 13(15.1%)                                           | 2 (11.1%)                               | 0                                                           | 5(35.7%)                                   |

[illegible]

**Table S2.** Table summarizes the resistant bacteria isolated from urine samples in cats

| Antibiotics                   | <i>Acinetobacter</i><br>spp. n=2 | <i>E. coli</i><br>n=80 | <i>Enterobacter</i> spp.<br>n=10 | <i>Enterococcus</i><br>spp. n=40 | <i>Klebsiella</i><br>spp. n=8 | <i>Pantoea</i><br><i>dispersa</i><br>n=1 | <i>Proteus</i><br><i>mirabilis</i><br>n=2 | <i>Pseudomonas</i><br><i>aeruginosa</i><br>n=1 | <i>Staphylococcus</i><br>spp. n=11 |
|-------------------------------|----------------------------------|------------------------|----------------------------------|----------------------------------|-------------------------------|------------------------------------------|-------------------------------------------|------------------------------------------------|------------------------------------|
| Ampicillin                    | 1(50%)                           | 44(55%)                | -                                | -                                | 8(100%)                       | -                                        | 2(100%)                                   | 1(100%)                                        | -                                  |
| Amoxicillin/Clavulanic acid   | -                                | 12(15%)                | 10(100%)                         | 4(10%)                           | 4(50%)                        | 0                                        | -                                         | -                                              | 5(45.4%)                           |
| Amikacin                      | 0                                | 0                      | 0                                | -                                | 0                             | 0                                        | 0                                         | 0                                              | 0                                  |
| Chloramphenicol               | -                                | 9(11.2%)               | 6(60%)                           | 6(15%)                           | 3(37.5%)                      | 0                                        | 2(100%)                                   | -                                              | 4(36.3%)                           |
| Cephalothin                   | -                                | 34(42.5%)              | 10(100%)                         | -                                | 7(87.5%)                      | 0                                        | 0                                         | -                                              | 3(27.2%)                           |
| Ceftiofur                     | 2(100%)                          | 18(22.5%)              | 9(90%)                           | -                                | 7(87.5%)                      | 0                                        | 0                                         | 1(100%)                                        | 4(36.3%)                           |
| Cephalexin                    | 1(50%)                           | 25(31.2%)              | 9(90%)                           | -                                | 7 (87.5%)                     | 0                                        | 0                                         | 1(100%)                                        | -                                  |
| Cefpodoxime                   | 2(100%)                          | 28 (35%)               | 8(80%)                           | -                                | 7(87.5%)                      | 0                                        | 0                                         | 1(100%)                                        | 1(9%)                              |
| Doxycycline                   | 0                                | 13(16.2%)              | 2(20%)                           | 17(42.5%)                        | 6(75%)                        | 0                                        | 0                                         | -                                              | 1(9%)                              |
| Enrofloxacin                  | -                                | 17(21.2%)              | 8(80%)                           | 14(35%)                          | 8(100%)                       | 0                                        | 2(100%)                                   | 1(100%)                                        | 6(54.5%)                           |
| Nitrofurantoin                | 1(50%)                           | 15(18.7%)              | 1(10%)                           | 0                                | 3(37.5%)                      | 0                                        | 2(100%)                                   | 1(100%)                                        | 1(9%)                              |
| Gentamicin                    | 1(50%)                           | 4(5%)                  | 4(40%)                           | -                                | 0                             | 0                                        | 0                                         | 0                                              | 2(18.1%)                           |
| Imipenem                      | 1(50%)                           | 0                      | 0                                | -                                | 0                             | 0                                        | 1(50%)                                    | 0                                              | -                                  |
| Marbofloxacin                 | 1(50%)                           | 17(21.2%)              | -                                | 21(52.5%)                        | -                             | 0                                        | 2(100%)                                   | 0                                              | -                                  |
| Trimethoprim/Sulfamethoxazole | 0                                | 18(22.5%)              | 7(70%)                           | -                                | 6(75%)                        | 0                                        | 2(100%)                                   | 1 (100%)                                       | 5 (45.4%)                          |
| Tetracycline                  | 1(50%)                           | 19(23.7%)              | 5(50%)                           | 8(20%)                           | 7(87.5%)                      | 0                                        | 2(100%)                                   | 1 (100%)                                       | 2 (18.1%)                          |
| Cefovecin                     | 2 (100%)                         | 11(13.7%)              | 9(90%)                           | 38(95%)                          | 6(75%)                        | 0                                        | 0                                         | 1 (100%)                                       | 5 (45.4%)                          |

[illegible]
